# Supplementary material
Source: PubMed Central journal article supplement (PMC6575162)
Supplement: pnas.1901642116.sapp.pdf [file pnas.1901642116.sapp.pdf]

1 **Supporting Information (SI Appendix): Low-gradient, single-threaded rivers prior to**  
2 **greening of the continents**

3 **A. Geological Context and Regional Background**

4 The “Torridonian Sandstone” is an informal stratigraphic name used to refer to the entire  
5 suite of Middle to Upper Proterozoic rocks exposed in the northwest highlands of Scotland, UK,  
6 comprising arkoses and subfeldspathic arenites, with occasional conglomerate and very minor  
7 shale horizons (1–4). They are internationally recognized as a classic type-example of  
8 Precambrian fluvial sedimentation. The rocks are exposed in a belt 20–30 km wide and more  
9 than 200 km long in northern Scotland (Fig. 1), lying underneath and cropping out in a window  
10 north of the trace of the regionally-significant Moine Thrust. They were deposited on top of  
11 Archean to Lower Proterozoic ‘Lewisian’ metamorphic basement over an unconformity surface  
12 with considerable erosional relief. Stratigraphically, the Torridonian succession has been divided  
13 into three groups (5): the Middle Proterozoic Stoer Group, the Sleat Group (which is mostly  
14 exposed on the Isle of Skye, Scotland, and whose relationship with the Stoer Group is  
15 enigmatic), and the Torridonian Group, which sits on an angular unconformity over the Stoer  
16 Group, but conformably overlies the Sleat Group where present. The data in this study solely  
17 refers to sedimentary strata of the Torridonian Group, which are Upper Proterozoic in age (4, 6).  
18 Diagenetic phosphate concretions in the lowest Torridonian Group yielded a whole rock Rb-Sr  
19 age of  $994 \pm 48$  Ma and a Pb-Pb age of  $951 \pm 120$  Ma (6, 7); these units unconformably overlie  
20 the well-studied Stac-Fada member of the Stoer Group, dated to  $1177 \pm 5$  Ma (8), which  
21 constrains the onset of Torridonian sedimentation to early Neoproterozoic time. The Torridonian  
22 Group is unconformably capped by Cambrian quartzite (4).

23 Three variables were measured in the field: a) set thickness, which is the thickness of the  
24 sedimentary package bounded by successive erosional boundaries (Fig. 2G), b) median grain  
25 size, which was estimated using scaled photographs and grain size card (Fig. 2H), and c) paleo-  
26 flow direction (Fig. 1C), which was estimated from the measured dip and dip direction of planar  
27 cross-bedding or the trend and plunge of the center of the trough cross beds, together with a  
28 correction for the dip and dip direction of the depositional bedding at each location (9).

### 29 **B. Variability-dominated preservation of river dune evolution**

30 Cross-stratified sets are depositional units formed by the migration of bedforms, and  
31 geometry of sets is controlled by the size of the formative bedforms, net aggradation rate, and the  
32 bedform celerity (10–13). Although the preservation of formsets can be common (13), especially  
33 when the local aggradation rates exceed bedform celerity, field evidence suggests that cross-  
34 stratification in the Torridonian Sandstone was a result of variable scours from migrating  
35 bedforms (Fig. S9). The empirical scaling relationship between cross-sets and formative bedform  
36 heights used in our study is based on an exact theory developed by Paola and Borgman (11) for  
37 the formation of cross-sets due to migrating bedforms under no net aggradation. They showed  
38 that the probability distribution of set thicknesses is given by the following one-parameter  
39 equation:

$$40 \quad f(d_{st}) = \frac{ae^{-ad_{st}}(e^{-ad_{st}} + ad_{st} - 1)}{(1 - e^{-ad_{st}})^2} \quad (S1)$$

41 in which  $d_{st} > 0$  is the set thickness, and  $a$  is the parameter of the distribution and is equal to  $2/\beta$ ,  
42 where  $\beta$  is the scale parameter of the Gamma distribution describing the formative bedform  
43 heights. The theoretical coefficient of variation of the distribution of set thicknesses is 0.88 (11).

44 The aforementioned distribution can be fit to the data when set thicknesses are measured at  
45 random spanning the entire set. Further, Bridge (14) demonstrated that the scaling relationship  
46 between cross-set thickness and mean bedform heights, and equation (S1) can be applied when  
47 the measured coefficient of variation of set thickness within a single set was  $0.88 \pm 0.3$ .

48 Measuring the set thickness across a complete set can be difficult in the field owing to the  
49 limited lateral exposure of outcrops; however, where near-complete exposure of sets were  
50 available in the field, the measured coefficient of variation of set thickness was within the  
51 bounds suggested by Bridge (14), and the theoretical density function of equation (S1) provided  
52 a reasonable description of the measured density of set thicknesses across the three stratigraphic  
53 intervals (Fig. S9). This observation is consistent with the inference that the bed sets were  
54 created by variables scours of migrating fluvial bedforms. Further, the estimated mean set  
55 thickness of these individual, near-complete sets was similar to the global mean of the set  
56 thickness within each stratigraphic interval. Thus, we used the global mean of set thickness  
57 within each stratigraphic interval for estimating the formative bedform heights.

### 58 **C. Comparison of flow depth estimates using different scaling relationships**

59 Several studies have demonstrated that bedform heights can be related to their formative flow  
60 depth, transport stage, grain size, shear stress and other parameters of the flow conditions (15);  
61 however, not all these relationships can be used within a stratigraphic framework owing to the  
62 difficulty of robust inversion of key parameters of flow conditions. In this study, we used the  $h_d$ -  
63  $H$  scaling relation reported by Bradley and Venditti (15). Other commonly used scaling  
64 relationships to invert for  $H$  include a relation provided by Leclair and Bridge (10), which builds

65 on the work of Yalin (16), where the ratio of  $H$  to  $h_d$  was constrained to lie within a range of 6 to  
66 10 with a mean of 8. Allen (17) provided a different formula for estimating  $H$  given by:

67 
$$H = 11.62(h_d)^{0.84} \quad (\text{S2})$$

68 where all quantities are in m. Estimating the formative flow depths from the aforementioned  
69 methods did not change our results significantly (Fig. S12). We used the method presented in  
70 Bradley and Venditti (15) because the uncertainty in the prediction of  $H$  was constrained, which  
71 allowed us to propagate this uncertainty into the estimation of slope and aspect ratio of channels  
72 through Monte Carlo sampling.

#### 73 **D. Bedform stability diagrams**

74 Several decades of experimental and field research resulted in the formulation of a graphical  
75 framework that represents the conditions of flow, sediment transport, and fluid properties  
76 necessary for the stable existence of various bed states in alluvial rivers (e.g., ripples, dunes,  
77 lower plane bed, upper plane bed, antidunes)(18–23). Dimensional analysis indicates that at least  
78 three independent dimensionless numbers are required to characterize the stability of bedform  
79 states, and the commonly used dimensionless numbers are Froude number ( $Fr$ , which determines  
80 the state of the flow), Shields parameter ( $\tau^*$ , describes the intensity of sediment transport), and  
81 particle Reynolds number ( $Re_p$ , that accounts for grain size and fluid viscosity), given by:

82 
$$Fr = \frac{U}{\sqrt{gH}} \quad (\text{S3a})$$

83 
$$\tau^* = \frac{\tau_b}{(\rho_s - \rho)gD_{50}} \quad (\text{S3b})$$

$$Re_p = \frac{\sqrt{RgD_{50}^3}}{\nu} \quad (S3c)$$

where  $U$  is the depth-averaged flow velocity,  $g$  is the gravitational acceleration,  $H$  is the flow depth,  $\tau_b$  is the bed shear stress approximated as  $\rho_s g H S$  for steady, uniform flow conditions,  $\rho_s$  is the density of sediment,  $\rho$  is the density of fluid,  $D_{50}$  is the median grain-size,  $R$  is the submerged specific density of sediment, and  $\nu$  is the kinematic viscosity of the fluid, which is temperature-dependent. For subcritical flows, the bedform stability diagram is independent of the Froude number and can be expressed in terms of the Shields stress and the particle Reynolds number. We used the bedform stability diagram of Lamb et al. (20) to constrain the dimensionless bed shear stress in this study. Lamb et al. (20) compiled existing field and experimental studies, and constructed a comprehensive bedform stability diagram that spans a large range in particle Reynolds numbers. Using this compilation, they delineated the boundaries between different bed states (Fig. S10A). We estimated the particle Reynolds number for our stratigraphic sampling intervals using the measured median grain-size (Fig. 2H), and by assuming a kinematic viscosity of water of  $10^{-6}$  m<sup>2</sup>/s. Froude number, which is needed for evaluating the stability of planform morphology (Fig. 3D), was estimated for Torridonian rivers using equation (S3a).

### **E. Data compilation of Proterozoic cross-set thickness**

We compiled cross-set thickness across 10 fluvial formations in the Proterozoic Eon (24–30). We chose a representative global sample that spanned Paleoproterozoic to Neoproterozoic deposits and restricted our compilation to studies that made extensive measurements of cross-set thickness to ensure that the measurements were a representative sample of each formation. Median grain-size measurements were not directly reported in previous studies; however, they

105 noted that the cross-sets were composed of medium-to-coarse sand. In some cases, we  
106 corroborated these estimates using the reported microphotographs of the sandstone units. For  
107 each formation, we estimated paleoslope by taking a conservative approach, where we assumed  
108 the median grain-size to be uniformly distributed and bound by 0.5 to 1.5 mm for Monte Carlo  
109 sampling (equations 2, 3 in *Materials and Methods*). Similar to the paleohydraulic analyses of  
110 the Torridonian Group, we estimated the flow depth from  $H-h_d$  scaling relation (equation 1 in  
111 *Materials and Methods*) and we used both the bedform stability diagram and modern empirical  
112 scaling relationships to estimate paleoslope through Monte Carlo sampling (Fig. 4 in main text).

#### 113 **F. Previous estimates of paleogradients of Proterozoic rivers**

114 A range of studies spanning three Paleoproterozoic formations, two Mesoproterozoic  
115 formations and multiple Neoproterozoic formations across four continents have suggested that  
116 gradients of Proterozoic rivers were steeper than that observed in post-Cambrian systems (24, 25,  
117 27, 31–36). These studies estimated gradients using measured cross-stratal thickness and  
118 empirical relationships based on width-depth scaling and discharge-width scaling of modern  
119 rivers. In particular, all these studies used empirical relationships that relate paleoslope to the  
120 width-depth ratio of flows and percentage of silt and clay in the channel perimeter (37, 38).  
121 Width-depth ratios were also empirically related to the percentage of silt and clay in the channel  
122 perimeter, which was equated to 5% on the basis of the *a priori* assumption that Proterozoic  
123 rivers were large bedload systems that were devoid of any cohesive bank strength. These results  
124 yielded average slopes for Proterozoic rivers that spanned  $4 \times 10^{-3}$  to  $4 \times 10^{-2}$ . These observations  
125 suggest that Proterozoic rivers resided in the natural depositional slope gap between modern  
126 alluvial fans and rivers — a consequence of hydrodynamic differences between flows (Froude-  
127 supercritical vs Froude-subcritical) that shape alluvial fans and rivers, respectively (39).

128 Consensus on the cause of steep Proterozoic fluvial gradients is currently lacking, and previous  
129 studies have attributed this inference to unique combination of weathering regime in the  
130 Proterozoic Eon and lack of vegetation (25), tectono-sedimentary history of basin evolution in  
131 combination with rigorous climate (34), and production of argillaceous sediment under hyper-  
132 greenhouse atmospheric conditions, which enabled temporary storage of this sediment to sustain  
133 steep slopes (27). It has also been noted that none of these mechanisms provide a unifying  
134 explanation for the steep fluvial gradients inferred in Proterozoic deposits worldwide, given that  
135 mud preservation in most Proterozoic fluvial systems is negligible (24). The lack of consensus  
136 on the cause of steep gradients across Proterozoic rivers together with the geodynamical  
137 implications indicated in our study suggest that steep super-continental-scale Proterozoic rivers  
138 that resided in the natural depositional slope gap between alluvial fans and alluvial rivers were  
139 unlikely to have existed. Moreover, the inferred steep paleoslopes from previous studies are  
140 inconsistent with the observation of ubiquitous cross-stratification throughout the Proterozoic  
141 eon, and also with the inference that these rivers represented predominantly bedload systems.

#### 142 **G. Data compilation of modern rivers**

143 We compiled 476 modern fluvial gradients (39–43), in addition to 30 modern alluvial fan  
144 gradients (39). Figure 4B in the main text shows the histograms of the fluvial gradients measured  
145 in modern rivers and alluvial fans along with the hypothesized natural depositional slope gap  
146 (39). In Figure 3D of the main text, we reproduced the ratio of slope and Froude number and the  
147 depth to width ratios reported in Parker (44) for modern braided, meandering, and straight  
148 channels.

Lower Applecross Formation:

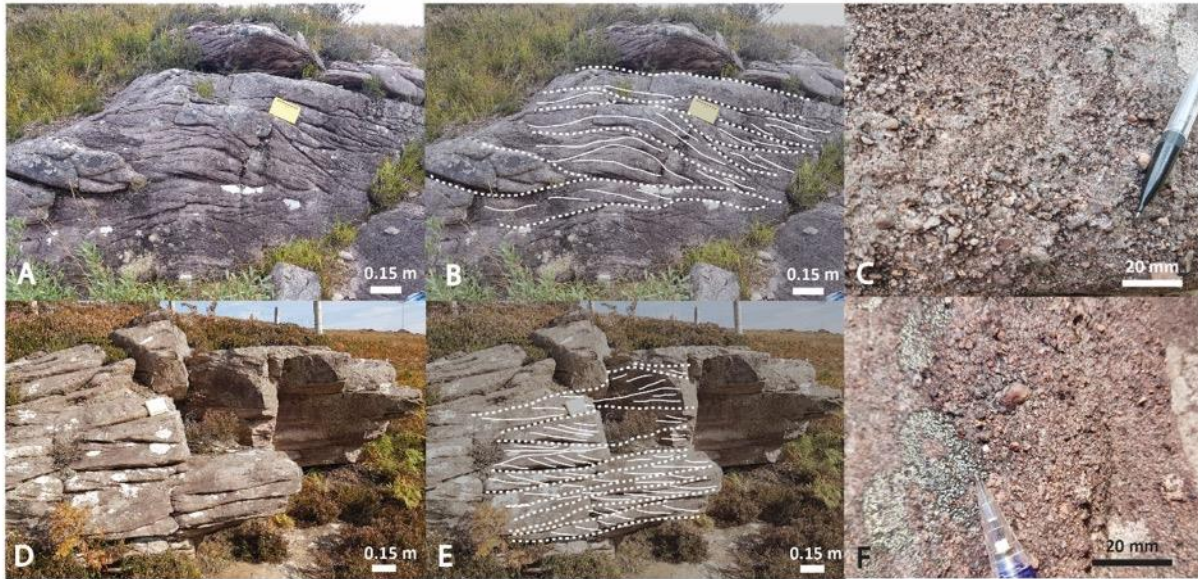

149 **Fig. S1.** Supplementary field photographs in the Lower Applecross. A, D) Original field  
150 photographs in the Lower Applecross. B, E) Annotated images where the dashed lines indicate  
151 the interpreted erosional boundaries and the solid lines indicate the observed cross-bedding. C,  
152 F) Representative macro photographs showing the grain-size observed at individual outcrops.

153



Upper Applecross Formation:

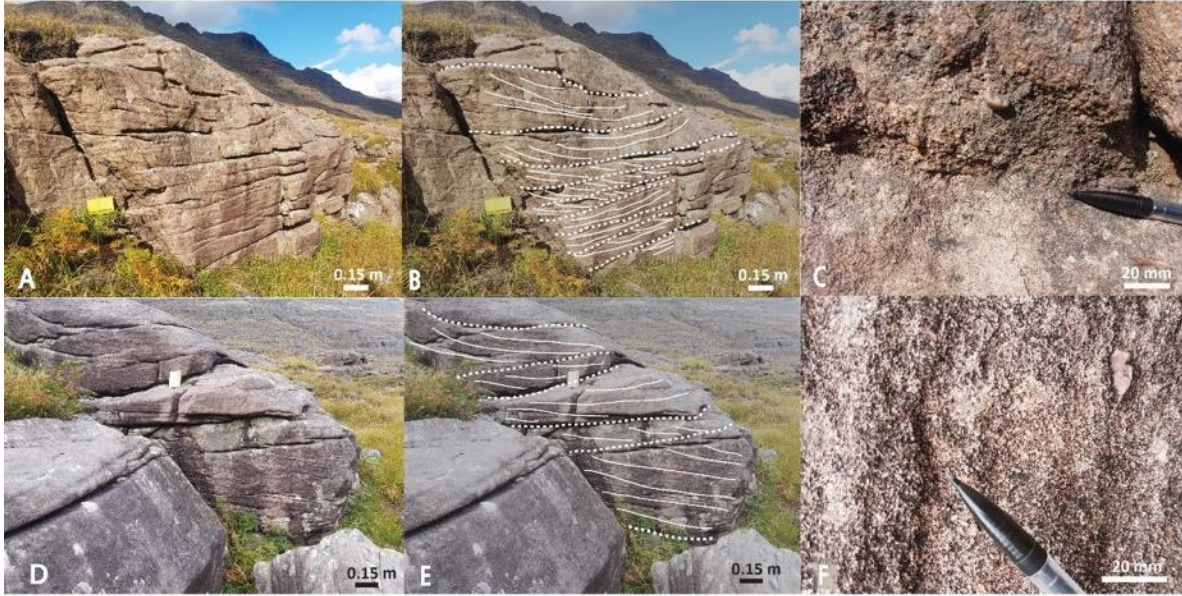

154

155

156

157

158

**Fig. S2.** Supplementary field photographs in the Upper Applecross. A, D) Original field photographs in the Upper Applecross. B, E) Annotated images where the dashed lines indicate the interpreted erosional boundaries and the solid lines indicate the observed cross-bedding. C, F) Representative macro photographs showing the grain-size observed at individual outcrops.

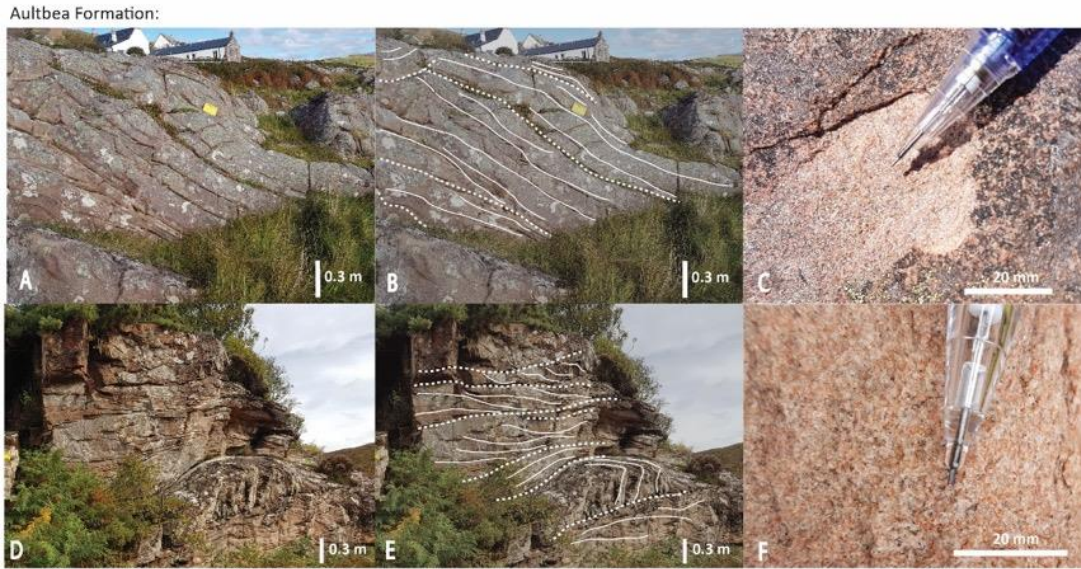

159

160 **Fig. S3.** Supplementary field photographs in the Aultbea Formation. A, D) Original field  
 161 photographs in the Aultbea Formation. B, E) Annotated images where the dashed lines indicate  
 162 the interpreted erosional boundaries and the solid lines indicate the observed cross-bedding. C,  
 163 F) Representative macro photographs showing the grain-size observed at individual outcrops.

164

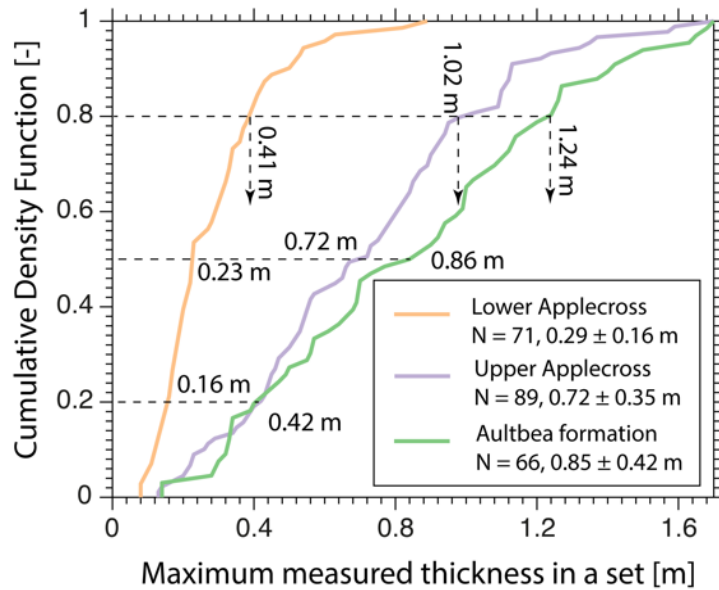

165

166 **Fig. S4.** Maximum set thickness measured within individual sets. Cumulative density function of  
167 the maximum set thickness measured within individual sets across the three stratigraphic  
168 sampling intervals. The dashed lines indicate 20<sup>th</sup>, 50<sup>th</sup>, and 80<sup>th</sup> percentile of the maximum set  
169 thickness. The mean and standard deviation of the maximum set thickness is indicated in the  
170 figure legend. The increase in set thickness with stratigraphic height is evident not only in the  
171 bulk statistics of set thickness (Fig. 2G), but also in the measured maximum set thickness within  
172 individual sets across LAF, UAF, and Aultbea Formation.

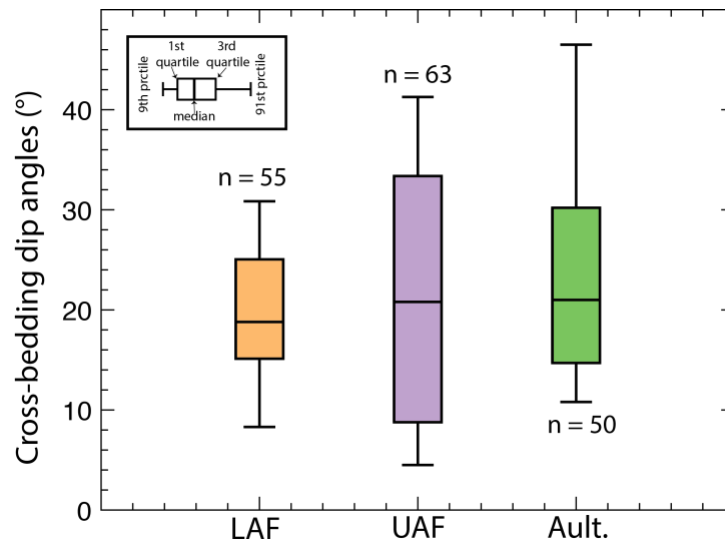

173  
174 **Fig. S5.** Cross-bedding angles measured in the Torridonian Group. Boxplots of the measured  
175 cross-bedding angles, which were corrected for the depositional dip (orange – LAF; purple –  
176 UAF; green – Aultbea Formation). These dip angles are similar to modern lee-face angles of  
177 river dunes, and markedly shallower than the dip of the inferred lateral accretion surfaces (Figs.  
178 S6, S7).

179



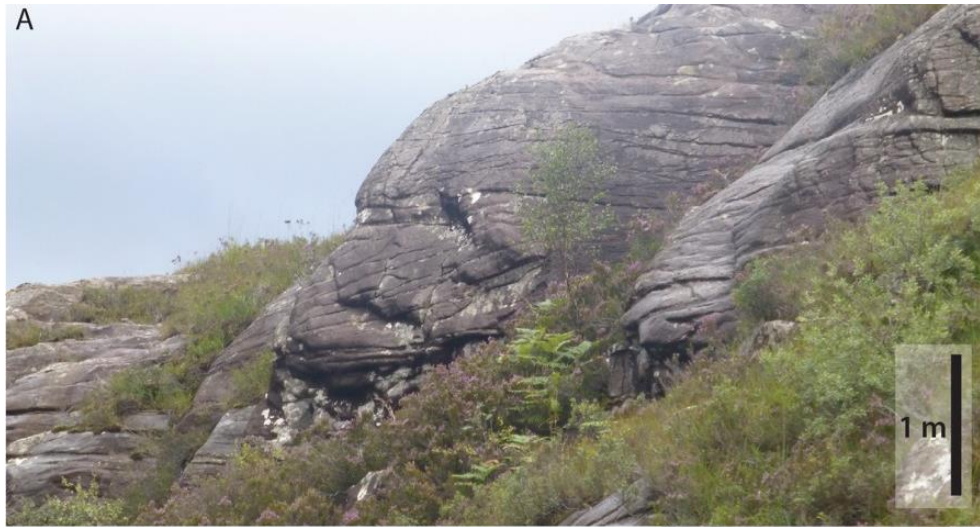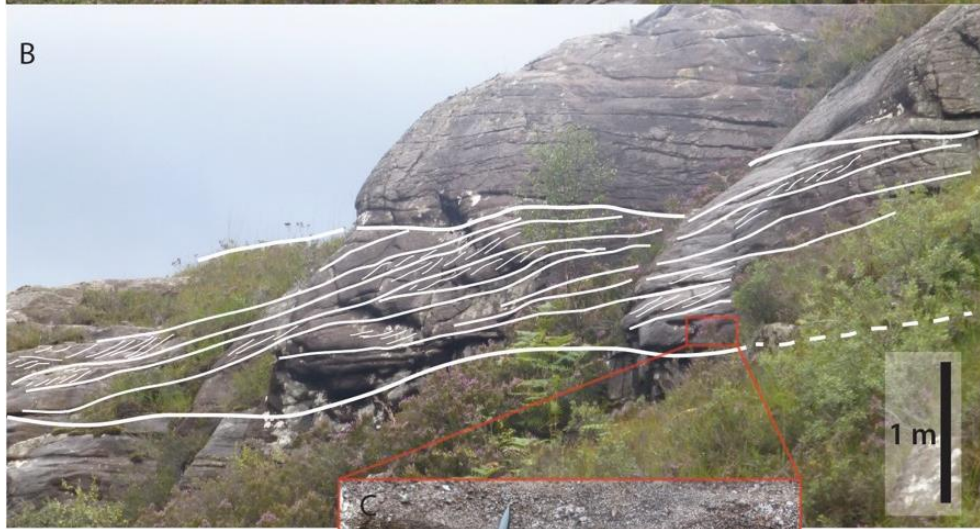

Fining up

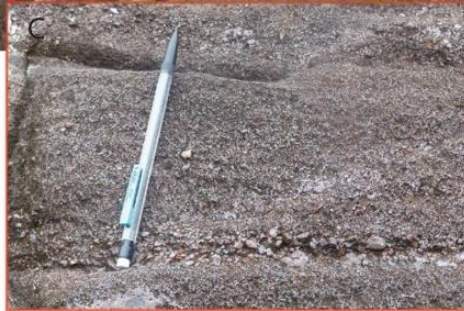

180

181

182 **Fig. S6.** Rare preserved barform in the Lower Applecross. A) Uninterpreted and B) interpreted  
183 truncated barform outcrop photographs in the Lower Applecross (location coordinates: NG  
184 95500 68702). The deposits are characterized by upward fining with the base of the major  
185 erosional surface composed of pebble lag (C). This coarse pebble lag is also a feature of the  
186 major erosional surface that bound the inferred lateral accretion sets. Solid, thick white lines  
187 indicate the lateral accretion surfaces and thin white lines indicate cross-stratification, which was  
188 inferred to represent superimposed bedforms on this putative barform. The maximum measured  
189 thickness of this truncated barform was 1.7 m.

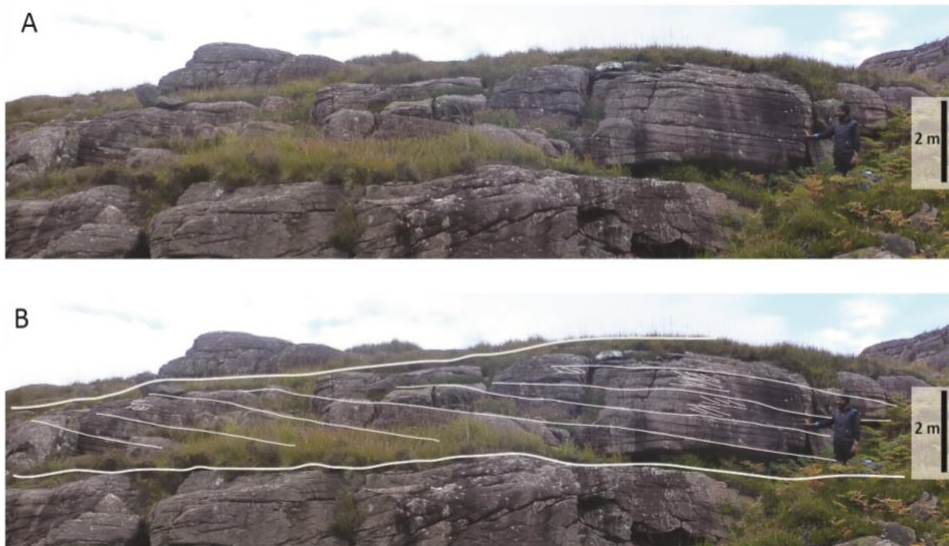

190

191 **Fig. S7.** Rare preserved barform in the Upper Applecross. A) Uninterpreted and B) interpreted  
192 truncated barform outcrop photographs in the Upper Applecross (location coordinates: NG  
193 91694 55653). Solid, thick white lines indicate the lateral accretion surfaces and thin white lines  
194 indicate cross-stratification, which was inferred to represent superimposed bedforms on this  
195 putative barform. The maximum measured thickness of this truncated barform was 4.7 m.

196

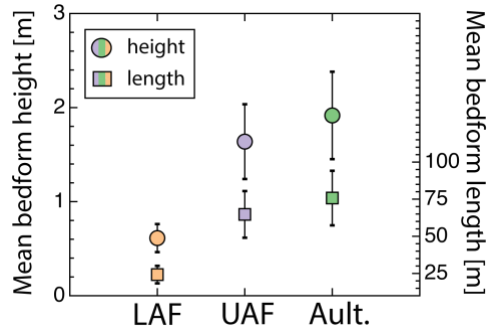

197

198

**Fig. S8.** Reconstructed geometry of bedforms in the Torridonian Sandstone. Reconstructed

199

bedform heights using scaling of mean cross-set thickness and formative dune heights (left axis;

200

circular markers). The bedform lengths were reconstructed using the empirical scaling

201

relationship presented in Bradley and Venditti (15) (right axis; square markers).

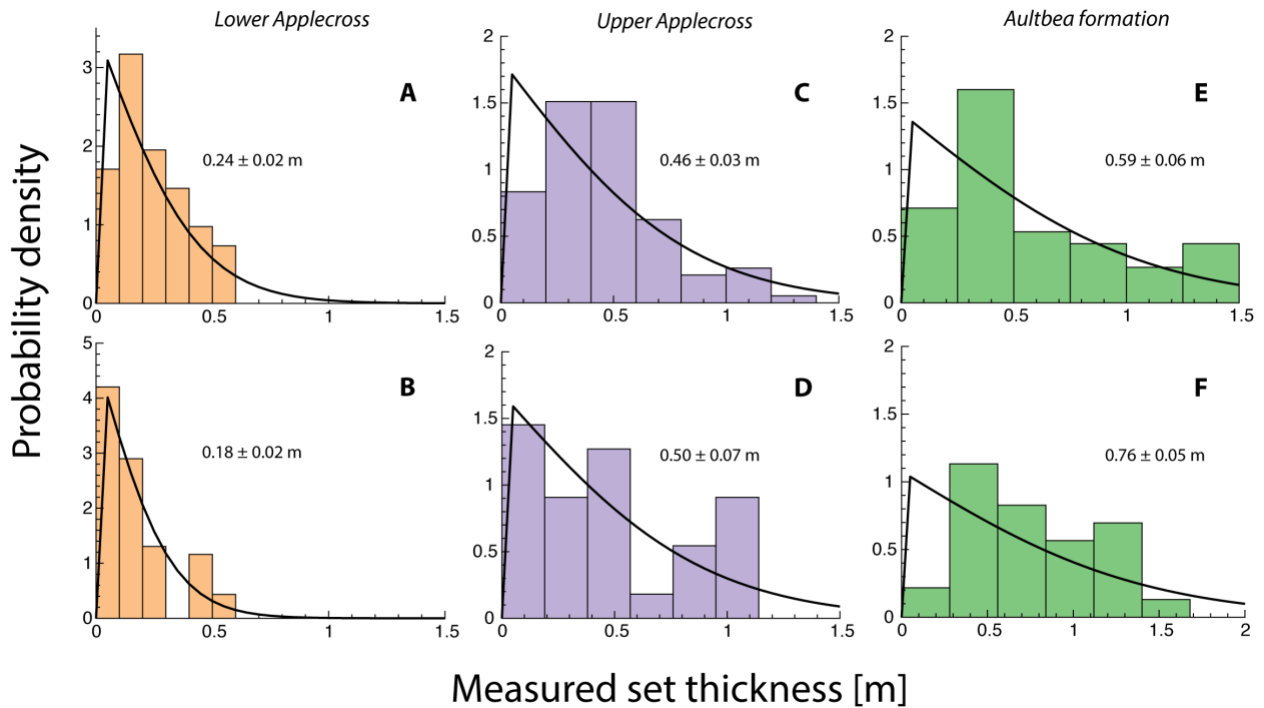

202

203

**Fig. S9.** Comparison of set thickness distribution with theory. Estimated probability density

204

functions for measured set thicknesses where near-complete exposure of sets was available for

205

(A-B) Lower Applecross, (C-D) Upper Applecross, and (E-F) Aultbea Formation. The solid

206  
207

black lines indicate the theoretical prediction (11) where the parameter  $a$  was estimated using  $a = 1.64493/(d_{st})$ .

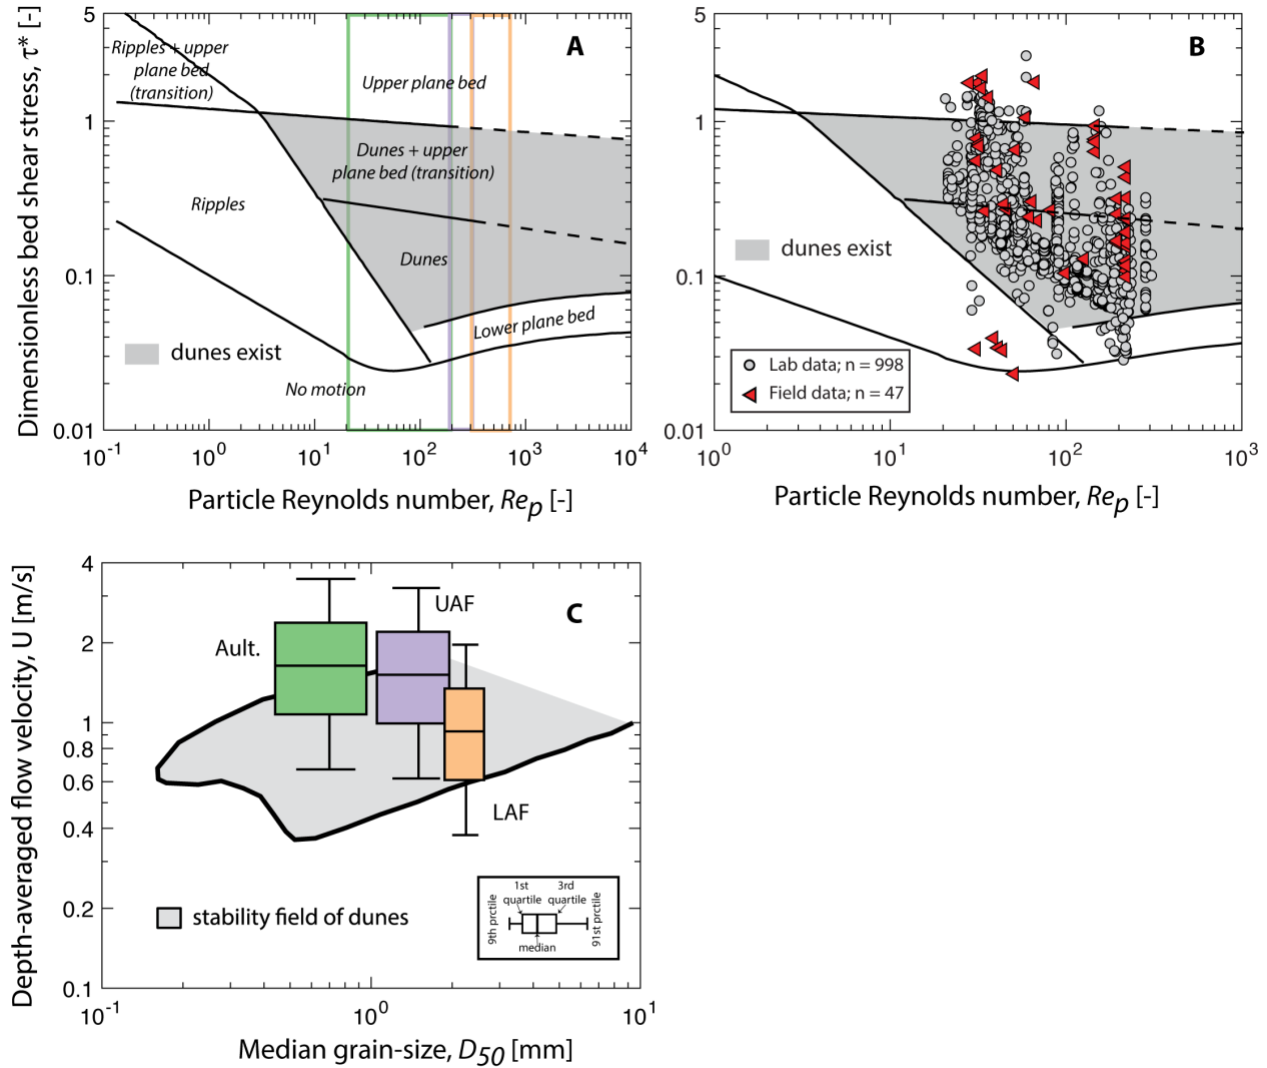

208

209 **Fig. S10.** Bedform stability diagram. A) Bedform stability diagram of Lamb et al. (20). The  
210 highlighted gray area indicates the stability field for the existence of river dunes. The estimated  
211 particle Reynolds number (equation S3C) for the three stratigraphic sampling intervals are  
212 indicated using colored rectangles. The solid black lines are fits of Lamb et al. (20) to the  
213 bedform transition boundaries validated using existing experimental or field studies. The dashed  
214 black lines denote the extrapolation of these bedform transition boundaries to higher particle

215 Reynolds numbers (20). B) Laboratory and field data with the same  $Re_p$  range as the  
 216 Torridonian Sandstone. The solid gray markers are experimental data, and the red triangles are  
 217 field data, which were derived from a recent global compilation (21). C) Bedform stability  
 218 diagram expressed in terms of depth-averaged flow velocity and median grain-size (19), where  
 219 the region bounded by the solid black line delineates the phase space for the stable existence of  
 220 fluvial dunes. Estimated depth-averaged flow velocities using Monte Carlo sampling are also  
 221 indicated (equation 5 in *Materials and Methods*).

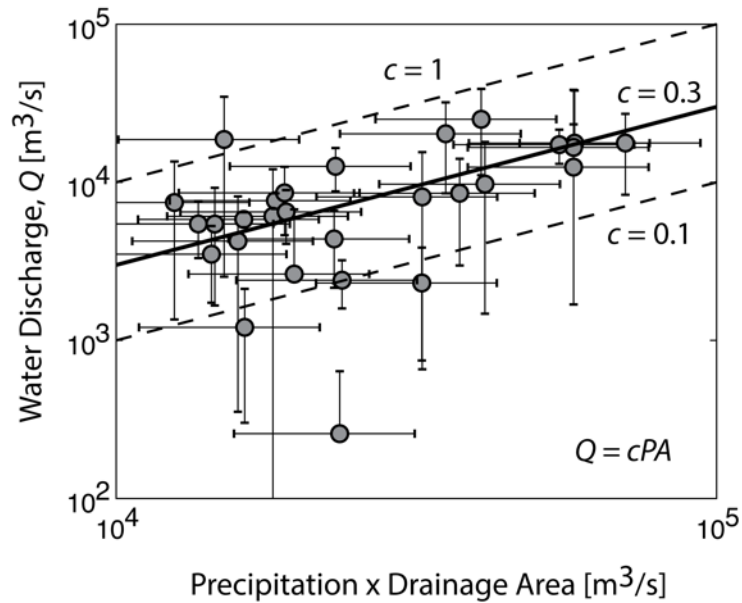

222  
 223 **Fig. S11.** Relationship between water discharge, precipitation rate, and drainage area in modern  
 224 continental-scale rivers in subtropical and temperate regions. The mean and standard deviation of  
 225 the observed water discharge are shown on the y-axis. The average period of record varies from  
 226 station to station with a mean of 21.5 years (45). The product of monthly precipitation rate and  
 227 drainage area are indicated on the x-axis. The markers indicate the computed value of  $PA$  for  $P =$   
 228  $0.75$  m/yr, and the error bars show the extent of computed value for  $P = 0.5$  m/yr and  $1$  m/yr.



229 This range corresponds to the observed global mean monthly precipitation rates in the  
230 subtropical and temperate regions (46).

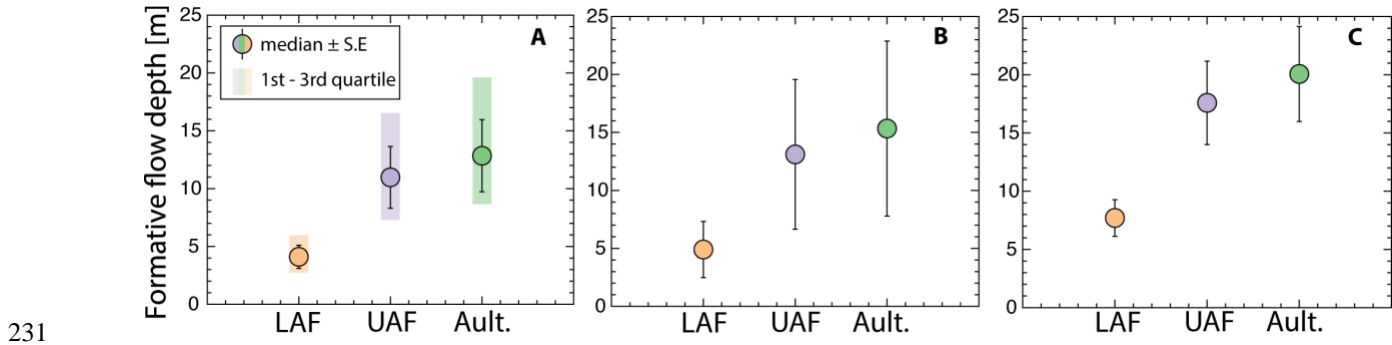

232 **Fig. S12.** Estimated flow depths for the Torridonian Group. A) Estimated  $H$  using the scaling  
233 relationship and the uncertainties of (15). B) Estimated  $H$  using the values of  $H/h_d$  reported in  
234 (10). C) Estimated  $H$  using equation (S2) proposed by Allen (17).

**Table S1.** Cross-set thickness and median grain-size measured in the Torridonian Group

| <b>Coordinates</b> | <b>Stratigraphic<br/>sampling<br/>interval</b> | <b>Mean<br/>cross-set<br/>thickness<br/>[m]</b> | <b>Number of<br/>measurements</b> | <b>Estimated<br/>median<br/>grain-size<br/>[mm]</b> | <b>Additional notes</b>                                                                                                 |
|--------------------|------------------------------------------------|-------------------------------------------------|-----------------------------------|-----------------------------------------------------|-------------------------------------------------------------------------------------------------------------------------|
| NG 93150 78407     | LAF                                            | 0.22                                            | 57                                | 2.5; 1.5                                            | 7 sets observed. Bottom set was v. coarse sand to granules, and top 6 sets were coarse to v. coarse sand                |
| NG 92715 70420     | LAF                                            | 0.17                                            | 80                                | 2.0; 3.0;<br>4.0                                    | 11 sets observed. Granules were typical of most sets. One set composed of fine gravel, and one set composed of granules |

|                  |     |      |    |                  |                                                                                                                               |
|------------------|-----|------|----|------------------|-------------------------------------------------------------------------------------------------------------------------------|
| NG 76853 73710   | LAF | 0.14 | 97 | 2.0; 3.0         | 12 sets identified. All deposits were characterized by granules with some sets coarser with granules between 2 to 4 mm.       |
| NG 79192 - 60530 | LAF | 0.66 | 10 | 2.0              | v. coarse sand to granules                                                                                                    |
| NC 22492 - 24866 | LAF | 0.24 | 41 | 1.5; 3.0;<br>0.8 | bottom 3 sets were v. coarse sand, and one set was composed of granules. Top set was composed to medium to coarse sand        |
| NC 22545 - 24814 | LAF | 0.17 | 69 | 1.5              | v. coarse sand                                                                                                                |
| NC 22552 - 24746 | LAF | 0.15 | 70 | 3.0; 2.5;<br>1.5 | 3 sets with overall upward fining trend. The grain size in sets ranged from granules and occasional pebbles to v. coarse sand |

|                  |     |      |    |                               |                                                                                                                           |
|------------------|-----|------|----|-------------------------------|---------------------------------------------------------------------------------------------------------------------------|
| NC 15426 - 05634 | LAF | 0.41 | 26 | 2.5; 3.0;<br>2.5; 3.0;<br>2.5 | v. coarse sand to granules with occasional pebbles                                                                        |
| NC 15436 - 05600 | LAF | 0.26 | 57 | 2.5; 3.0;<br>2.5; 3.0;<br>2.5 | v. coarse sand to granules with occasional pebbles                                                                        |
| NG 95806 68529   | LAF | 0.28 | 12 | 3.0; 2.0;<br>1.5              | 3 sets with upward fining trend. Granules in bottom set and v. coarse sand in the top set                                 |
| NG 95565 68685   | LAF | 0.23 | 8  | 1.0                           | Coarse sand                                                                                                               |
| NG 95500 68702   | LAF | 0.22 | 10 | 1.0                           | Coarse sand                                                                                                               |
| NG 95463 68727   | LAF | 0.27 | 7  | 1.3; 2.5                      | Stratigraphically higher set had 1 to 2 mm sediment sizes visible, but dominantly made up of sediment size close to 1 mm. |

|                  |     |      |    |      |                                                                  |
|------------------|-----|------|----|------|------------------------------------------------------------------|
|                  |     |      |    |      | Lowest set was composed of granules in the 2 to 3 mm range.      |
| NG 95178 68806   | LAF | 0.26 | 9  | 1.5  | Dominantly 1 to 2 mm with granules at the base of sets.          |
| NG 77774 - 41846 | UAF | 0.70 | 9  | 1    | Medium to coarse sand with grain size closer to 1 mm             |
| NG 77778 - 41705 | UAF | 0.44 | 6  | 0.75 | Observed grain size was between 0.5 and 1 mm                     |
| NG 77779 - 41641 | UAF | 0.84 | 11 | 0.5  | Medium to coarse sand                                            |
| NG 77727 - 41579 | UAF | 0.46 | 28 | 0.4  | Medium sand and slightly finer than previous location            |
| NG 77922 - 41565 | UAF | 0.67 | 15 | 0.4  | Medium sand and slightly finer than NG 77779-41641 location sets |

|                |     |      |    |                   |                                                                                                                                                                                                   |
|----------------|-----|------|----|-------------------|---------------------------------------------------------------------------------------------------------------------------------------------------------------------------------------------------|
| NG 91678 55533 | UAF | 0.80 | 42 | 2.5; 1.5;<br>0.75 | 6 sets were observed. Bottom set was v. coarse sand with pebbles. Higher 3 sets were coarse to v. coarse sand. The top 2 sets were medium to coarse sand, finer than 1 mm but coarser than 0.5 mm |
| NG 91653 55704 | UAF | 0.78 | 36 | 1.75; 1.5; 1      | 4 sets observed. The middle set was v.coarse sand. The bottom set was coarser than the middle set but still v. coarse sand. The top sets were coarse to v. coarse sand.                           |

|                |     |      |    |                           |                                                                                                                                                                                          |
|----------------|-----|------|----|---------------------------|------------------------------------------------------------------------------------------------------------------------------------------------------------------------------------------|
| NG 91921 55947 | UAF | 0.79 | 25 | 0.75; 0.5;<br>1.5; 2      | 4 sets were interpreted with different grain-sizes. The sets were composed of v. coarse sand with pebbles, coarse to v. coarse sand, medium to coarse sand, and coarse to v. coarse sand |
| NG 91942 55960 | UAF | 0.42 | 30 | 2.5                       | 5 sets were observed and all sets were composed of pebbles and coarse granules                                                                                                           |
| NG 91901 55936 | UAF | 0.71 | 41 | 1; 0.5; 2.5;<br>1; 1; 1.5 | 6 sets observed with varying grain-sizes. We noted sets with coarse sand with some pebbles, medium to coarse sand, granules, and coarse sand                                             |

|                |     |      |    |                          |                                                                                                                                                                                                                                                      |
|----------------|-----|------|----|--------------------------|------------------------------------------------------------------------------------------------------------------------------------------------------------------------------------------------------------------------------------------------------|
| NG 91701 55534 | UAF | 0.49 | 29 | 3; 1.5; 1.5;<br>1.5; 2.5 | 5 sets were observed.<br>One set was composed of granules, another set was composed of coarse to v. coarse sand with lenses of medium sand. Two sets were classified as v. coarse sand, and finally one set was v. coarse sand with granules > 2 mm. |
| NG 76832 43318 | UAF | 0.97 | 20 | 0.5                      | All 3 sets composed of medium sand                                                                                                                                                                                                                   |
| NG 76796 43296 | UAF | 0.42 | 30 | 0.5; 1; 2                | 4 sets observed with 2 sets composed of medium sand, one set composed of coarse sand and one set composed of v. coarse sand and pebbles                                                                                                              |



|                |       |      |    |                   |                                                                                                                                       |
|----------------|-------|------|----|-------------------|---------------------------------------------------------------------------------------------------------------------------------------|
| NB 98096 12863 | UAF   | 0.45 | 96 | 1.5               | 8 sets observed and all composed of v. coarse sand                                                                                    |
| NB 97224 13317 | UAF   | 0.52 | 39 | 1.5; 3.5; 3;<br>4 | 5 sets observed, which were much coarser than other UAF sets. Pebbles and granules were noted throughout the locality                 |
| NG 84374 91884 | UAF   | 0.49 | 82 | 1.5               | 9 sets observed. All sets composed of v. coarse sand with occasional granules and pebbles                                             |
| NG 84022 92369 | UAF   | 0.40 | 63 | 1.5; 3; 1.5       | 8 sets were observed. All sets were composed of v. coarse sand except for one. That set was composed of granules and very fine gravel |
| NG 71230 39983 | Ault. | 0.79 | 48 | 0.5               | Medium sand in all sets. 4 sets were observed                                                                                         |

|                |       |      |    |              |                                                                                                       |
|----------------|-------|------|----|--------------|-------------------------------------------------------------------------------------------------------|
| NG 71314 39873 | Ault. | 0.72 | 33 | 0.2          | Fine to medium sand                                                                                   |
| NG 71024 37955 | Ault. | 0.58 | 45 | 0.2          | 5 sets composed of fine to medium sand                                                                |
| NG 71210 38192 | Ault. | 0.69 | 22 | 0.35         | 3 sets were identified.                                                                               |
| NG 71024 37955 | Ault. | 0.43 | 32 | 0.2          | Fine to medium sand                                                                                   |
| NG 71172 38779 | Ault. | 0.62 | 19 | 0.2          | Fine to medium sand                                                                                   |
| NG 88706 94043 | Ault. | 0.45 | 31 | 0.2          | Fine to medium sand                                                                                   |
| NG 88663 94099 | Ault. | 0.51 | 27 | 0.75; 1.25   | 3 sets were identified, and they were composed of medium to coarse sand, and coarse to v. coarse sand |
| NG 88774 94062 | Ault. | 0.62 | 36 | 0.75; 1; 0.2 | 4 sets were identified, and they were composed of coarse sand, and fine to medium sand                |

|                  |       |      |    |           |                                                                                                                   |
|------------------|-------|------|----|-----------|-------------------------------------------------------------------------------------------------------------------|
| NB 98947 13842   | Ault. | 0.76 | 82 | 0.75; 0.2 | 9 sets were identified. 3 of them were composed of coarse sand, and the rest were composed of fine to medium sand |
| NB 99315 10309   | Ault. | 0.58 | 48 | 0.5       | Medium sand                                                                                                       |
| NB 99050 09933   | Ault. | 0.93 | 43 | 0.5       | Medium sand                                                                                                       |
| NG 88934 95450   | Ault. | 0.87 | 50 | 0.5; 0.25 | Total of 4 sets were identified. 3 sets composed of medium sand, and one set composed of fine to medium sand      |
| NG 85160 - 90783 | Ault. | 0.12 | 9  | 1.5; 2.5  | Only instance in Aultbea formation where granules > 2 mm were documented                                          |
| NG 89150 - 96078 | Ault. | 0.49 | 20 | 1.5       | 3 v. coarse sand sets                                                                                             |

|                  |       |      |    |        |                                                          |
|------------------|-------|------|----|--------|----------------------------------------------------------|
| NG 89169-960568  | Ault. | 0.46 | 13 | 1; 1.5 | Sets with coarse sand and v. coarse sand were documented |
| NG 89202 - 96095 | Ault. | 0.68 | 11 | 1; 1.5 | v. coarse sand with occasional pebble/granule            |

237

### Supplementary References

- 238 1. Peach BN, Horne J (1892) The Olennellus Zone in the north-west Highlands of Scotland. *Q J Geol Soc*  
239 48(1888):227–242.
- 240 2. Allen P (1948) Wealden petrology : The Top Ashdown Pebble Bed and the Top Ashdown Sandstone. *Q J*  
241 *Geol Soc* 104(1–4):257 LP – 321.
- 242 3. Nicholson PG (1993) *A basin reappraisal of the Proterozoic Torridon Group, northwest Scotland*  
243 (International Association of Sedimentologists).
- 244 4. Stewart AD (2002) The later Proterozoic Torridonian rocks of Scotland: their sedimentology, geochemistry  
245 and origin. *Geological Society, London* (Geological Society of London), p 132.
- 246 5. Stewart AD (1969) Torridonian Rocks of Scotland Reviewed. *AAPG, Memoirs*, ed Kay M (American  
247 Association of Petroleum Geologists), pp 595–608.
- 248 6. Kinnaird TC, et al. (2007) The late Mesoproterozoic–early Neoproterozoic tectonostratigraphic evolution of  
249 NW Scotland: the Torridonian revisited. *J Geol Soc London* 164(3):541–551.
- 250 7. Turnbull MJM, Whitehouse MJ, Moorbath S (1996) New isotopic age determinations for the Torridonian,  
251 NW Scotland. *J Geol Soc London* 153(6):955–964.
- 252 8. Parnell J, Mark D, Fallick AE, Boyce A, Thackrey S (2011) The age of the Mesoproterozoic Stoer Group  
253 sedimentary and impact deposits, NW Scotland. *J Geol Soc London* 168(2):349–358.
- 254 9. Cardozo N, Allmendinger RW (2013) Spherical projections with OSXStereonet. *Comput Geosci* 51:193–  
255 205.
- 256 10. Leclair SF, Bridge JS (2001) Quantitative Interpretation of Sedimentary Structures Formed by River Dunes.  
257 *J Sediment Res* 71(5):713–716.
- 258 11. Paola C, Borgman L (1991) Reconstructing random topography from preserved stratification. *Sedimentology*  
259 38(4):553–565.
- 260 12. Ganti V, Paola C, Fofoula-Georgiou E, Fofoula-Georgiou E (2013) Kinematic controls on the geometry  
261 of the preserved cross sets. *J Geophys Res Earth Surf* 118(3):1296–1307.
- 262 13. Reesink AJHH, et al. (2015) Extremes in dune preservation: Controls on the completeness of fluvial  
263 deposits. *Earth-Science Rev* 150:652–665.
- 264 14. Bridge JS (1997) Thickness of sets of cross strata and planar strata as a function of formative bed-wave  
265 geometry and migration, and aggradation rate. *Geology* 25(11):971–974.
- 266 15. Bradley RW, Venditti JG (2017) Reevaluating dune scaling relations. *Earth-Science Rev* 165:356–376.
- 267 16. Yalin MS (1964) Geometrical properties of sand waves. *J Hydraul Div* 90(5):105–119.
- 268 17. Allen JRL (1968) *Current Ripples* (North-Holland Publishing Co., Amsterdam).
- 269 18. Southard JB, Boguchwal LA (1990) Bed configuration in steady unidirectional water flows; Part 2,  
270 Synthesis of flume data. *J Sediment Res* 60(5):658–679.
- 271 19. Carling PA (1999) Subaqueous gravel dunes. *J Sediment Res* 69(3):534–545.
- 272 20. Lamb MP, Grotzinger JP, Southard JB, Tosca NJ (2012) Were Aqueous Ripples on Mars Formed by  
273 Flowing Brines? *Sedimentary Geology of Mars*, eds Grotzinger JP, Milliken RE (SEPM Society for

- 274 Sedimentary Geology). Available at: <https://doi.org/10.2110/pec.12.102.0139>.
- 275 21. Ohata K, Naruse H, Yokokawa M, Viparelli E (2017) New Bedform Phase Diagrams and Discriminant  
276 Functions for Formative Conditions of Bedforms in Open-Channel Flows. *J Geophys Res Earth Surf*  
277 122(11):2139–2158.
- 278 22. Allen JRL (1984) *Sedimentary Structures; Their Character and Physical Basis* (Elsevier, Amsterdam).
- 279 23. Southard JB (1991) Experimental Determination of Bed-Form Stability. *Annu Rev Earth Planet Sci*  
280 19(1):423–455.
- 281 24. Mukhopadhyay S, Choudhuri A, Samanta P, Sarkar S, Bose PK (2014) Were the hydraulic parameters of  
282 Precambrian rivers different? *J Asian Earth Sci* 91:289–297.
- 283 25. Van der Neut M, Eriksson PG (1999) Palaeohydrological parameters of a Proterozoic braided fluvial system  
284 (Wilgerivier Formation, Waterberg Group, South Africa) compared with a Phanerozoic example. *IAS Spec*  
285 *Publ* 28:381–392.
- 286 26. Eriksson PG, Bumby AJ, Brümer JJ, van der Neut M (2006) Precambrian fluvial deposits: Enigmatic  
287 palaeohydrological data from the c. 2–1.9 Ga Waterberg Group, South Africa. *Sediment Geol* 190(1):25–46.
- 288 27. Eriksson P, et al. (2008) Palaeohydrological data from the c. 2.0 to 1.8 Ga Waterberg Group, South Africa:  
289 discussion of a possibly unique Palaeoproterozoic fluvial style. *South African J Geol* 111(2–3):281–304.
- 290 28. Köykkä J (2011) Precambrian alluvial fan and braidplain sedimentation patterns: Example from the  
291 Mesoproterozoic Rjukan Rift Basin, southern Norway. *Sediment Geol* 234(1–4):89–108.
- 292 29. Köykkä J (2011) The sedimentation and paleohydrology of the Mesoproterozoic stream deposits in a strike-  
293 slip basin (Svinsaga Formation), Telemark, southern Norway. *Sediment Geol* 236(3–4):239–255.
- 294 30. Sarkar S, Samanta P, Mukhopadhyay S, Bose PK (2012) Stratigraphic architecture of the Sonia Fluvial  
295 interval, India in its Precambrian context. *Precambrian Res* 214–215:210–226.
- 296 31. Eriksson PG, Bose PK, Catuneanu O, Sarkar S, Banerjee S (2008) Precambrian clastic epeiric embayments:  
297 examples from South Africa and India. *Dyn epeiric seas* 48:119–136.
- 298 32. Rainbird RH (1992) Anatomy of a large-scale braid-plain quartzarenite from the Neoproterozoic Shaler  
299 Group, Victoria Island, Northwest Territories, Canada. *Can J Earth Sci* 29(12):2537–2550.
- 300 33. Köykkä J (2011) Precambrian alluvial fan and braidplain sedimentation patterns: Example from the  
301 Mesoproterozoic Rjukan Rift Basin, southern Norway. *Sediment Geol* 234(1–4):89–108.
- 302 34. Köykkä J (2011) The sedimentation and paleohydrology of the Mesoproterozoic stream deposits in a strike-  
303 slip basin (Svinsaga Formation), Telemark, southern Norway. *Sediment Geol* 236(3–4):239–255.
- 304 35. Sarkar S, Samanta P, Mukhopadhyay S, Bose PK (2012) Stratigraphic architecture of the Sonia Fluvial  
305 interval, India in its Precambrian context. *Precambrian Res* 214–215:210–226.
- 306 36. Eriksson PG, Bumby AJ, Brümer JJ, van der Neut M (2006) Precambrian fluvial deposits: Enigmatic  
307 palaeohydrological data from the c. 2–1.9 Ga Waterberg Group, South Africa. *Sediment Geol* 190(1):25–46.
- 308 37. Schumm SA (1968) *River Adjustment to Altered Hydrologic Regimen- Murrumbidgee River and*  
309 *Paleochannels, Australia* (US Government Printing Office).
- 310 38. Schumm SA (1972) Fluvial Paleochannels. *Sepm*, eds Rigby JK, Hamblin WK (SEPM Society for  
311 Sedimentary Geology), pp 98–107.
- 312 39. Blair TC, McPherson JG (1994) Alluvial fans and their natural distinction from rivers based on morphology,  
313 hydraulic processes, sedimentary processes, and facies assemblages. *J Sediment Res* 64(3a):450–489.
- 314 40. Trampus SM, Huzurbazar S, McElroy B (2014) Empirical assessment of theory for bankfull characteristics  
315 of alluvial channels. *Water Resour Res* 50(12):9211–9220.
- 316 41. Gaurav K, et al. (2015) Morphology of the Kosi megafan channels. *Earth Surf Dyn* 3(3):321–331.
- 317 42. Métivier F, et al. (2016) Geometry of meandering and braided gravel-bed threads from the Bayanbulak  
318 Grassland, Tianshan, P. R. China. *Earth Surf Dynam* 4(1):273–283.
- 319 43. Chatanantavet P, Lamb MP, Nittrouer JA (2012) Backwater controls of avulsion location on deltas. *Geophys*  
320 *Res Lett* 39(1). doi:10.1029/2011GL050197.
- 321 44. Parker G (1976) On the cause and characteristic scales of meandering and braiding in rivers. *J Fluid Mech*  
322 76(3):457–480.
- 323 45. VOROSMARTY CJ, FEKETE BM, TUCKER BA (1998) Global River Discharge, 1807-1991, V[ersion].  
324 1.1 (RivDIS). doi:10.3334/ornlDaac/199.
- 325 46. Macdonald FA, Swanson-Hysell NL, Park Y, Lisiecki L, Jagoutz O (2019) Arc-continent collisions in the  
326 tropics set Earth’s climate state. *Science* 364:181–184.
- 327
